# Supplementary material for: Association of social vulnerability and depression incidence post intracerebral haemorrhage: a cohort study
Source: PubMed Central journal article supplement — BMJ Neurol Open. 2024 Dec 18;6(2):e000728. doi: 10.1136/bmjno-2024-000728 (PMC11667396; doi:10.1136/bmjno-2024-000728), 2024-12-18
Supplement: bmjno-6-2-s001.pdf [file bmjno-6-2-s001.pdf]

Supplemental Table 1. Characteristics of ineligible, pre-ICH depression, and deceased patients

|                                                   | Ineligible Survivors | Pre-ICH Depression | Deceased Patients |
|---------------------------------------------------|----------------------|--------------------|-------------------|
|                                                   | n= 211               | n= 84              | n= 2,071          |
| <b>Demographics</b>                               |                      |                    |                   |
| Age at ICH event (median, IQR)                    | 67, 57-77            | 74, 67-83          | 77, 69-84         |
| Sex (male, %)                                     | 114, 54.0            | 32, 38.1           | 1,052, 53.2       |
| <b>Race &amp; Ethnicity (%)</b>                   |                      |                    |                   |
| White                                             | 163, 68.2            | 76, 90.5           | 1,739, 87.9       |
| Black                                             | 17, 8.1              | 2, 2.4             | 85, 4.3           |
| Asian                                             | 15, 7.1              | 3, 3.6             | 84, 4.2           |
| Multiple, Other, and Unknown                      | 16, 7.6              | 3, 3.6             | 70, 3.5           |
| Hispanic                                          | 24, 11.4             | 2, 2.4             | 63, 3.2           |
| <b>Education</b>                                  |                      |                    |                   |
| Less than high school                             | 23, 10.9             | 4, 4.8             | 71, 3.6           |
| Completed high school                             | 144, 68.2            | 59, 70.2           | 1,726, 87.3       |
| Completed college or more                         | 44, 20.9             | 21, 25.0           | 180, 9.1          |
| <b>Medical History</b>                            |                      |                    |                   |
| Hypertension                                      | 171, 82.2            | 65, 78.3           | 1,573, 80.1       |
| Diabetes                                          | 35, 16.7             | 19, 22.9           | 445, 22.8         |
| Prior ICH                                         | 12, 5.7              | 1, 1.2             | 129, 6.6          |
| Atrial Fibrillation                               | 32, 15.3             | 19, 22.9           | 492, 25.2         |
| Coronary Artery Disease                           | 33, 15.9             | 20, 24.1           | 515, 26.4         |
| Pre-ICH Dementia                                  | 6, 2.9               | 12, 14.5           | 324, 16.7         |
| <b>Neuroimaging Characteristics (median, IQR)</b> |                      |                    |                   |
| Lobar Hematoma Location (%)                       | 62, 29.4             | 54, 64.3           | 884, 44.7         |
| Hematoma volume                                   | 9.8, 3.0-20.0        | 9.4, 2.6-28.9      | 23.0, 6.6-58.8    |
| Intraventricular volume                           | 0-0-2.3              | 0, 0-1.2           | 0.6, 0-11.7       |
| <b>Acute ICH Characteristics (median, IQR)</b>    |                      |                    |                   |
| Admission GCS Score                               | 15, 14-15            | 15, 12-15          | 12, 6-15          |
| ICH Score                                         | 1, 0-2               | 1, 0-2             | 2, 2-3            |
| Discharge mRS                                     | 4, 3-4               | 4, 3-5             | 6, 4-6            |
| <b>Patient Location One Week Post-ICH</b>         |                      |                    |                   |
| Home                                              | 56, 26.5             | 20, 23.8           | 133, 6.9          |
| Acute Rehab                                       | 66, 31.3             | 22, 26.2           | 238, 12.3         |
| Nursing Home                                      | 3, 1.4               | 2, 2.4             | 34, 1.8           |
| Still in Hospital                                 | 86, 40.8             | 30, 35.7           | 746, 39.2         |
| <b>Structural Determinants (median, IQR)</b>      |                      |                    |                   |
| AQI: Median Score                                 | 38, 32-39            | 38, 32-39          | 38, 32-39         |
| SVI: Overall Percentile Rank                      | 0.23, 0.23-0.46      | 0.36, 0.27-0.63    | 0.23, 0.23-0.46   |
